# Supplementary material
Source: PubMed Central journal article supplement (PMC5596427)
Supplement: cdd201790x2.pdf [file cdd201790x2.pdf]

**Table S1 Autophagy core machinery gene expression analysis**

|                                 |           | PSCs/Fibroblasts |              |
|---------------------------------|-----------|------------------|--------------|
|                                 | gene name | fold change      | p value      |
| <b>Ulk1 kinase complex</b>      | Ulk1      | 2.76             | 1.32E-08***  |
|                                 | Ulk2      | 0.75             | 0.05         |
|                                 | Atg13     | 1.95             | 5.82E-08***  |
|                                 | FIP200    | 0.21             | 7.23E-09***  |
|                                 | Atg101    | 2.1              | 1.93E-10***  |
| <b>classIII PI3K Complex</b>    | PIK3R4    | 1.17             | 4.93e-08***  |
|                                 | VPS34     | 2.12             | 7.24E-10***  |
|                                 | Becn1     | 1.07             | 0.6719372    |
|                                 | atg14     | 3.13             | 6.82E-11***  |
|                                 | ambra1    | 2.7              | 1.03E-04***  |
|                                 | UVRAG     | 0.6              | 0.002**      |
|                                 | SH3GLB1   | 0.85             | 2.2e-16***   |
| <b>Atg9 and its cycling</b>     | ATG2A     | 1.47             | 5.0E-04***   |
|                                 | ATG2B     | 1.19             | 0.35         |
|                                 | ATG9A     | 0.38             | 4.91E-09***  |
|                                 | ATG9B     | 1.17             | 0.054        |
|                                 | WIPI1     | 0.67             | 1.6E-04***   |
|                                 | WIPI2     | 1.28             | 0.037*       |
|                                 | WIPI3     | 1.18             | 0.045*       |
|                                 | WIPI4     | 1.46             | 0.0012**     |
|                                 | DFCP1     | 1.02             | 0.4927       |
|                                 | VMP1      | 0.88             | 3.357e-06*** |
| <b>Atg12 conjugation system</b> | atg12     | 1.17             | 0.012        |
|                                 | atg5      | 1.36             | 3.1 E-04***  |
|                                 | atg16l    | 1.32             | 0.002**      |
|                                 | atg7      | 1.06             | 0.27         |
|                                 | atg10     | 0.79             | 1.402e-10*** |
| <b>LC3 conjugation system</b>   | LC3A      | 0.38             | 3.03E-10***  |
|                                 | LC3B      | 1.37             | 0.058        |
|                                 | Gabarap   | 0.16             | 4.69E-12***  |
|                                 | GabarapL1 | 0.27             | 1.17E-09***  |
|                                 | GabarapL2 | 2.22             | 1.54E-06***  |
|                                 | Atg3      | 0.9              | 0.171        |
|                                 | Atg4A     | 1.34             | 0.0068       |
|                                 | Atg4B     | 0.77             | 5.99E-05***  |
|                                 | Atg4C     | 1.16             | 0.5          |
|                                 | Atg4D     | 2.87             | 7.80E-11***  |
