# Supplementary material
Source: PubMed Central journal article supplement (PMC5596427)
Supplement: cdd201790x3.pdf [file cdd201790x3.pdf]

**Table S2 FOXO1 targeting sequence numbers in autophagy genes**

| Autophagy gene name | Foxo1 targeting sequences |        |
|---------------------|---------------------------|--------|
|                     | AAACAA                    | TTGTTT |
| ULK1                | 3                         | 1      |
| ULK2                | 2                         | 2      |
| ATG13               | 1                         | 2      |
| FIP200              | 5                         | 4      |
| ATG101              | 2                         | 1      |
| ATG2A               | 4                         | 0      |
| ATG2B               | 1                         | 0      |
| ATG9A               | 2                         | 1      |
| ATG9B               | 1                         | 2      |
| WIP1                | 1                         | 0      |
| WIP2                | 3                         | 0      |
| WIP3                | 4                         | 1      |
| WIP4                | 2                         | 3      |
| DFCP1               | 1                         | 6      |
| VMP1                | 1                         | 6      |
| PIK3R4              | 0                         | 2      |
| VPS34               | 0                         | 1      |
| BECN1               | 6                         | 1      |
| ATG14               | 1                         | 6      |
| AMBRA1              | 1                         | 2      |
| UVRAG               | 1                         | 2      |
| SH3GLB1             | 1                         | 1      |
| ATG12               | 3                         | 0      |
| ATG5                | 0                         | 3      |
| ATG16L1             | 1                         | 1      |
| ATG16L2             | 0                         | 0      |
| ATG7                | 3                         | 3      |
| ATG10               | 2                         | 4      |
| LC3A                | 4                         | 3      |
| LC3B                | 3                         | 1      |
| GABARAP             | 1                         | 2      |
| GABARAPL1           | 6                         | 2      |
| GABARAPL2           | 0                         | 3      |
| ATG4A               | 1                         | 2      |
| ATG4B               | 0                         | 0      |
| ATG4C               | 0                         | 2      |
| ATG4D               | 0                         | 0      |
| ATG3                | 7                         | 0      |
| In total            | 74                        | 70     |
