# Supplementary material
Source: PubMed Central journal article supplement (PMC5596427)
Supplement: cdd201790x4.pdf [file cdd201790x4.pdf]

**Table S3-1 RT-PCR Primers**

| <b>Gene name</b>          | <b>Forward primer sequence</b> | <b>Reverse primer sequence</b> |
|---------------------------|--------------------------------|--------------------------------|
| <i>Ulk1</i>               | 5'-TGGAGGTGGCCGTCAAATG-3'      | 5'-CGCATAGTGTGCAGGTAGTC-3'     |
| <i>Ulk2</i>               | 5'-AGCTTCAGCATGAAAACATCGT-3'   | 5'-CGATTGGCATAAGACAACAGGA-3'   |
| <i>Atg13</i>              | 5'-CCAGGCTCGACTTGGAGAAAA-3'    | 5'-AGATTTCCACACACATAGATCGC-3'  |
| <i>Fip200</i>             | 5'-GACACTGAGCTAACTGTGCAA-3'    | 5'-GCGCTGTAAGTACACACTCTTC-3'   |
| <i>Atg101</i>             | 5'-ATGAACTGTGCATCAGAAGTGC-3'   | 5'-CCTATGGAGTACGTGCCCT-3'      |
| <i>Atg2a</i>              | 5'-CCACCTCTGCAAATCGGCA-3'      | 5'-CCAGTTGTCCTGATACCTCCA-3'    |
| <i>Atg2b</i>              | 5'-GTCCCCTTGGACAAATGGTGT-3'    | 5'-GGACGGACAGGGAAATGGA-3'      |
| <i>Atg9a</i>              | 5'-CAGTTTGACACTGAATACCAGCG-3'  | 5'-AATGTGGTGCCAAGGTGATTT-3'    |
| <i>Atg9b</i>              | 5'-ATGTACCCGAAGGACTCCG-3'      | 5'-CATTCCGCTGATGATAGCTGT-3'    |
| <i>Wipi1</i>              | 5'-CGGAACACGAGTTTGCAGC-3'      | 5'-CGGCACAAGATTATAGGGGGAAA-3'  |
| <i>Wipi2</i>              | 5'-AGGATAACACGTCCCTAGCTG-3'    | 5'-TCTCTCCACAATGCAGACATCT-3'   |
| <i>Wipi3</i>              | 5'-CGGGTGT TTTGCATGTGGAAT-3'   | 5'-GTTGGGAGGGTATTTCCGTTT-3'    |
| <i>Wipi4</i>              | 5'-GCCATTCACTATCAATGCACATC-3'  | 5'-TCGTGGCTGAAGTTAATGCAG-3'    |
| <i>Dfcp1</i>              | 5'-CATGTGCCAGGAGAGTTATGC-3'    | 5'-GAGTCTTATCCGCTCATGGTTTC-3'  |
| <i>Vmp1</i>               | 5'-CCAGAGACGCATAGCAATGAG-3'    | 5'-GCAAGGTAATGAGTGGCTGTC-3'    |
| <i>Pi3kr4</i>             | 5'-CTGGCGACAGGAGACTGAC-3'      | 5'-GGGAAACCAAGTCCCAGAA-3'      |
| <i>Vps34</i>              | 5'-CCTGGACATCAACGTGCAG-3'      | 5'-TGTCTCTTGGTATAGCCCAGAAA-3'  |
| <i>Becn1</i>              | 5'-ATGGAGGGGTCTAAGGCGTC-3'     | 5'-TCCTCTCCTGAGTTAGCCTCT-3'    |
| <i>Atg14</i>              | 5'-AGCGGTGATTTTCGTCTATTTTCG-3' | 5'-GCTGTTCAATCCTCATCTTGCAT-3'  |
| <i>Ambra1</i>             | 5'-CCAGAGAAGAATGCTGTACGAAT-3'  | 5'-TCCATCGAGTCTTATCCTCCAC-3'   |
| <i>Uvrug</i>              | 5'-ACATCGCTGCTCGGAACATT-3'     | 5'-CTCCACGTCCGATTCAAGGAA-3'    |
| <i>Sh3glb1</i>            | 5'-AACCTCCTTAGCAAAGCTGAATG-3'  | 5'-GGGTTGTTTATACGACTTGGTGC-3'  |
| <i>Atg12</i>              | 5'-GACCATCCAAGGACTCAT-3'       | 5'-GTTTACCATCACTGCCAAA-3'      |
| <i>Atg5</i>               | 5'-TGTGCTTCGAGATGTGTGGTT-3'    | 5'-GTCAAATAGCTGACTCTTGGCAA-3'  |
| <i>Atg16l1</i>            | 5'-CAGAGCAGCTACTAAGCGACT-3'    | 5'-AAAAGGGGAGATTCGGACAGA-3'    |
| <i>Atg7</i>               | 5'-GTTTCGCCCCCTTTAATAGTGC-3'   | 5'-TGAACTCCAACGTCAAGCGG-3'     |
| <i>Atg10</i>              | 5'-GTAGTTACCAAGTGCCGGTTC-3'    | 5'-AGCTAACGGTCTCCCATCTAAA-3'   |
| <i>Lc3a</i>               | 5'-GACCGCTGTAAGGAGGTGC-3'      | 5'-CTTGACCAACTCGCTCATGTTA-3'   |
| <i>Lc3b</i>               | 5'-TTATAGAGCGATAACAAGGGGAG-3'  | 5'-CGCCGTCTGATTATCTTGATGAG-3'  |
| <i>Gabarap</i>            | 5'-AAGAGGAGCATCCGTTTCGAGA-3'   | 5'-GCTTTGGGGGCTTTTTCCAC-3'     |
| <i>Gabarapl1</i>          | 5'-GGACCACCCCTTCGAGTATC-3'     | 5'-CCTCTTATCCAGATCAGGGACC-3'   |
| <i>Gabarapl2</i>          | 5'-TCGGGCTCTCAGATTGTTGAC-3'    | 5'-ATGGCCTTCTCGGAGGGAA-3'      |
| <i>Atg4a</i>              | 5'-GCTGGTATGGATTCTGGGGAA-3'    | 5'-TGGGTTGTTCTTTTTGTCTCTCC-3'  |
| <i>Atg4b</i>              | 5'-TATGATACTCTCCGTTTTGCTGA-3'  | 5'-GTTCCCCCAATAGCTGAAAAG-3'    |
| <i>Atg4c</i>              | 5'-AGATGAAAGCAAGATGTTGCCT-3'   | 5'-CCCTGTAGGTCAGCCATATTCTA-3'  |
| <i>Atg4d</i>              | 5'-GTCAAGTATGGTTGGGCAGTT-3'    | 5'-TGTCACCCTCTCCCTCGAAAT-3'    |
| <i>Atg3</i>               | 5'-ACACGGTGAAGGGAAAGGC-3'      | 5'-TGGTGGACTAAGTGATCTCCAG-3'   |
| <i>Foxo1</i>              | 5'-ATGCTCAATCCAGAGGGAGG-3'     | 5'-ACTCGCAGGCCACTTAGAAAA-3'    |
| <i>Foxo3</i>              | 5'-CTGGGGGAACCTGTCCTATG-3'     | 5'-TCATTCTGAACGCGCATGAAG-3'    |
| <i>Tfeb</i>               | 5'-CCACCCCAGCCATCAACAC-3'      | 5'-CAGACAGATACTCCCGAACCTT-3'   |
| <i>Creb</i>               | 5'-AGCAGCTCATGCAACATCATC-3'    | 5'-AGTCCTTACAGGAAGACTGAACT-3'  |
| <i>Atf4</i>               | 5'-CCTGAACAGCGAAGTGTTGG-3'     | 5'-TGGAGAACCCATGAGGTTTCAA-3'   |
| <i>p27<sup>KIP1</sup></i> | 5'-TCAAACGTGAGAGTGTCTAACG-3'   | 5'-CCGGGCCGAAGAGATTTCTG-3'     |
| <i>Oct4</i>               | 5'-GTGGAGGAAGCCGACAACAATGA-3'  | 5'-CAAGCTGATTGGCGATGTGAG-3'    |
| <i>Sox2</i>               | 5'-GCGGAGTGGAACTTTTGTCC-3'     | 5'-CGGGAAGCGTGTACTTATCCTT-3'   |
| <i>Nanog</i>              | 5'-TCTTCCTGGTCCCCACAGTTT-3'    | 5'-GCAAGAATAGTTCTCGGGATGAA-3'  |
| <i>Klf4</i>               | 5'-GTGCCCCGACTAACC GTT-3'      | 5'-GTCGTTGAACTCCTCGGTCT-3'     |
| <i>Esrrb</i>              | 5'-CAGGCAAGGATGACAGACG-3'      | 5'-GAGACAGCACGAAGGACTGC-3'     |
| <i>Fbx15</i>              | 5'-TCGTGGGACTGAGCACA ACTA-3'   | 5'-TGACAGATGAGCCTCTAACAAAC-3'  |

|                |                                |                               |
|----------------|--------------------------------|-------------------------------|
| <i>Tbx3</i>    | 5'-TTGCAAAGGGTTTTTCGAGAC-3'    | 5'-TGGAGGACTCATCCGAAGTC-3'    |
| <i>Rex1</i>    | 5'-CCCTCGACAGACTGACCCTAA-3'    | 5'-TCGGGGCTAATCTCACTTTCAT-3'  |
| <i>Tcl1</i>    | 5'-AAATTCAGGTGATCTTGCG-3'      | 5'-TGTCCTTGGGGTACAGTTGC-3'    |
| <i>Sox17</i>   | 5'-GATGCGGGATACGCCAGTG-3'      | 5'-CCACCACCTCGCCTTTCAC-3'     |
| <i>Gata4</i>   | 5'-CCCTACCCAGCCTACATGG-3'      | 5'-ACATATCGAGATTGGGGTGTCT-3'  |
| <i>Gata6</i>   | 5'-CTCAGGGGTAGGGGCATCA-3'      | 5'-GAGGACAGACTGACACCTATGTA-3' |
| <i>Afp</i>     | 5'-CTTCCCTCATCCTCCTGCTAC-3'    | 5'-ACAAACTGGGTAAAGGTGATGG-3'  |
| <i>Scl</i>     | 5'-CTGGCCTCCAGCTACATTTCT-3'    | 5'-GTCACGGTCTTTGCTCAACTT-3'   |
| <i>Gata2</i>   | 5'-CACCCCGCCGTATTGAATG-3'      | 5'-CCTGCGAGTCGAGATGGTTG-3'    |
| <i>T</i>       | 5'-GCTTCAAGGAGCTAACTAACGAG-3'  | 5'-CCAGCAAGAAAGAGTACATGGC-3'  |
| <i>Eomes</i>   | 5'-GCGCATGTTTCCTTTCTTGAG-3'    | 5'-GGTCGGCCAGAACCACTTC-3'     |
| <i>Fgf5</i>    | 5'-CTGTATGGACCCACAGGGAGTAAC-3' | 5'-ATTAAGCTCCTGGGTCGCAAG-3'   |
| <i>Otx2</i>    | 5'-TATCTAAAGCAACCGCCTTACG-3'   | 5'-AAGTCCATACCCGAAGTGGTC-3'   |
| <i>Nestin</i>  | 5'-CCCTGAAGTCGAGGAGCTG-3'      | 5'-CTGCTGCACCTCTAAGCGA-3'     |
| <i>Sox1</i>    | 5'-AAGGAACACCCGGATTACAAGT-3'   | 5'-GTTAGCCCAGCCGTTGACAT-3'    |
| <i>β-actin</i> | 5'-GGCTGTATTCCCCTCCATCG-3'-3'  | 5'-CCAGTTGGTAACAATGCCATGT-3'  |
