# Supplementary material
Source: PubMed Central journal article supplement (PMC5596427)
Supplement: cdd201790x5.pdf [file cdd201790x5.pdf]

**Table S3-2 Primers for gene cloning**

| <b>Name</b> | <b>Primer sequence</b>                    |
|-------------|-------------------------------------------|
| ATG3-WT-F   | 5'-GGAATTCGCCACCATGCAGAATGTGATCAAC-3'     |
| ATG3-WT-R   | 5'-ATAAGAATGCGGCCGCCTACATTGTGAAGTGTCT-3'  |
| ATG3-V8D-F  | 5'-CAGAGCCTTTCCCTTGTCCGTGTTGATCACATTC-3'  |
| ATG3-V8D-R  | 5'-GAATGTGATCAACACGGACAAGGGAAAGGCTCTGG-3' |
| FOXO1-WT-F  | 5'-GGCTTCGAATACTTCTCTGCTGGTGGG-3'         |
| FOXO1-WT-R  | 5'-GGCGGATCCACTAACTCTTAGCCTGACAC-3'       |
| FOXO1-DB-F  | 5'-CAGCAACAGCTCGGCGAGCAAGTTTATTCGAGTG-3'  |
| FOXO1-DB-R  | 5'-CTCGAATAAACTTGCTCGCCGAGCTGTTGCTGTC-3'  |
| IVS-TetR-F  | 5'-CGCGGATCCGTGAGTTTGGGGACCCTT-3'         |
| IVS-TetR-R  | 5'-GCGGCTAGCAGATCCCTAGAACTCCCGGGA-3'      |
