# Supplementary material
Source: PubMed Central journal article supplement (PMC5596427)
Supplement: cdd201790x6.pdf [file cdd201790x6.pdf]

**Table S3-3 Primers for CHIP**

| <b>Gene name</b> | <b>Primer sequence</b>           |
|------------------|----------------------------------|
| <i>Ulk1-F</i>    | 5'-CAGGACCCGACACATACA-3'         |
| <i>Ulk1-R</i>    | 5'-ATCTCTGGTTGTGGCTCC-3'         |
| <i>Ulk2-F</i>    | 5'-AAGTGAGAGAGGTGAGAGGA-3'       |
| <i>Ulk2-R</i>    | 5'-CCTCGGATTGTTTAGGTG-3'         |
| <i>Atg13-F</i>   | 5'-GGTCACAGGCTAAACAAA-3'         |
| <i>Atg13-R</i>   | 5'-TAGCTGGCTTCTTGGTAA-3'         |
| <i>Wipi2-F</i>   | 5'-GATAGTAACCCTCTGCCA-3'         |
| <i>Wipi2-R</i>   | 5'-CGGAATCTCAGGAGACTA-3'         |
| <i>Vps34-F</i>   | 5'-CAGGTTCCCCAAATGAC-3'          |
| <i>Vps34-R</i>   | 5'-TTTATAGGGCTGGGGAG-3'          |
| <i>Becn1-F</i>   | 5'-GAAGAGTGTGGGCAGCT-3'          |
| <i>Becn1-R</i>   | 5'-CCCAGGACCAGAAGTGA-3'          |
| <i>Atg14-F</i>   | 5'-TGATGTCTGGGAGTGTTAGCCTGCTA-3' |
| <i>Atg14-R</i>   | 5'-CTTTTAACGCCTCTGCCCGACTTT-3'   |
| <i>Uvrag-F</i>   | 5'-AAGTGGAGGCTGCTGTGGTG-3'       |
| <i>Uvrag-R</i>   | 5'-AGGGGCGAGATTTGGCTG-3'         |
| <i>Atg5-F</i>    | 5'-CACACCCAGGATAACCAGAGAAT-3'    |
| <i>Atg5-R</i>    | 5'-ATTTCTGCCACGACACTTTGC-3'      |
| <i>Atg7-F</i>    | 5'-CTTCTTCCTAACGCTCAT-3'         |
| <i>Atg7-R</i>    | 5'-TGTGTGTGTGTGCCTTAT-3'         |
| <i>Atg12-F</i>   | 5'-ATTACCTCTCCTCAAACG-3'         |
| <i>Atg12-R</i>   | 5'-CGAAGTAGCATCTGTGAA-3'         |
| <i>Lc3b-F</i>    | 5'-CGAGTGCTGGGATTAAG-3'          |
| <i>Lc3b-R</i>    | 5'-AAGGGCACACACATGGTA-3'         |
| <i>P27kip1-F</i> | 5'-TTTTTACGCATCGCTGCTACT-3'      |
| <i>P27kip1-R</i> | 5'-GCTTAGCCGACCTCACTACG-3'       |
