# Supplementary material
Source: PubMed Central journal article supplement (PMC5596427)
Supplement: cdd201790x7.pdf [file cdd201790x7.pdf]

**Table S3-4 shRNA**

| <b>Gene name</b> | <b>Target sequences</b>     |
|------------------|-----------------------------|
| <i>Ulk1</i>      | 5'-GAGCAAGAGCACACGGAAA-3'   |
| <i>Becn1</i>     | 5'-GGTTTGGAAAGATGCTTTA-3'   |
| <i>Atg5</i>      | 5'-AGCCTCCTCTTCTCGTCAAAT-3' |
| <i>Luc (Scr)</i> | 5'-CTTACGCTGAGTACTTCGAAA-3' |
